# Supplementary material
Source: PubMed Central journal article supplement (PMC3100700)

**Table S1. Highly significant SNPs in HMIP and *BCL11A* found in 619 Chinese  $\beta$ -thalassemia heterozygotes.**

| Gene             | Gene position                                     | Chromosome | SNP               | Chromosome position | Minor/Major allele | Minor allele frequency | $\beta$ <sup>#</sup> | P-value          |
|------------------|---------------------------------------------------|------------|-------------------|---------------------|--------------------|------------------------|----------------------|------------------|
| <i>ALDH8A1</i>   | 5'                                                | 6q23       | <b>rs4646869</b>  | 60,577,176          | A / G              | <b>0.28</b>            | - 0.22               | <b>2.80 E-08</b> |
| HMIP             | Sequences<br>5' to <i>HBSIL</i><br>and <i>MYB</i> | 6q23       | <b>rs6913541</b>  | 135,450,809         | G / A              | <b>0.31</b>            | - 0.26               | <b>9.16 E-11</b> |
|                  |                                                   |            | <b>rs9494139</b>  | 135,456,486         | G / A              | <b>0.32</b>            | - 0.23               | <b>1.19 E-09</b> |
|                  |                                                   |            | <b>rs7775698</b>  | 135,460,328         | T / C              | <b>0.22</b>            | <b>0.44</b>          | <b>1.38 E-23</b> |
|                  |                                                   |            | <b>rs9399137</b>  | 135,460,711         | C / T              | <b>0.21</b>            | <b>0.45</b>          | <b>1.39 E-24</b> |
|                  |                                                   |            | <b>rs4895441</b>  | 135,468,266         | G / A              | <b>0.24</b>            | <b>0.40</b>          | <b>5.93 E-21</b> |
|                  |                                                   |            | <b>rs9376092</b>  | 135,468,837         | A / C              | <b>0.24</b>            | <b>0.40</b>          | <b>2.73 E-21</b> |
|                  |                                                   |            | <b>rs9494145</b>  | 135,474,245         | C / T              | <b>0.22</b>            | <b>0.39</b>          | <b>1.39 E-18</b> |
|                  |                                                   |            | <b>rs1320963</b>  | 135,484,905         | G / A              | <b>0.37</b>            | - 0.24               | <b>1.11 E-10</b> |
|                  |                                                   |            | <b>rs1569534</b>  | 135,493,273         | T / C              | <b>0.40</b>            | - 0.20               | <b>4.49 E-08</b> |
| <b>rs6569992</b> | 135,493,845                                       | A / G      | <b>0.21</b>       | <b>0.34</b>         | <b>3.91 E-14</b>   |                        |                      |                  |
| <i>BCL11A</i>    | 3' UTR                                            | 2p16       | <b>rs1012585</b>  | 60,525,061          | G / A              | <b>0.29</b>            | <b>0.23</b>          | <b>1.29 E-08</b> |
| <i>BCL11A</i>    | IVS II                                            | 2p16       | <b>rs17331129</b> | 60,533,446          | C / T              | <b>0.26</b>            | <b>0.23</b>          | <b>9.46 E-08</b> |
|                  |                                                   |            | <b>rs12477097</b> | 60,551,901          | A / C              | <b>0.26</b>            | <b>0.30</b>          | <b>4.36 E-12</b> |
|                  |                                                   |            | <b>rs6545816</b>  | 60,568,365          | A / C              | <b>0.24</b>            | <b>0.34</b>          | <b>2.49 E-14</b> |
|                  |                                                   |            | <b>rs6545817</b>  | 60,568,683          | C / T              | <b>0.24</b>            | <b>0.33</b>          | <b>2.43 E-14</b> |
|                  |                                                   |            | <b>rs766432</b>   | 60,573,474          | C / A              | <b>0.24</b>            | <b>0.34</b>          | <b>2.40 E-15</b> |
|                  |                                                   |            | <b>rs6729815</b>  | 60,577,176          | T / C              | <b>0.24</b>            | <b>0.34</b>          | <b>1.56 E-14</b> |

<sup>#</sup>  $\beta$  equals % change in Hb F per copy of minor allele.

**Table S2. Genotyped and imputed SNPs in LD with rs9399137 among Chinese and African Americans, their MAF and association *P*-value with HbF.**

| SNP            | Chr. 6 Position | SNP Type  | Chinese $\beta$ -thalassemia heterozygotes |      |                 | African Americans with sickle cell anemia (11) |                 | Candidate for functional motif |
|----------------|-----------------|-----------|--------------------------------------------|------|-----------------|------------------------------------------------|-----------------|--------------------------------|
|                |                 |           | LD to rs9399137                            | MAF  | <i>P</i> -value | MAF                                            | <i>P</i> -value |                                |
| rs9399136      | 135,444,032     | Imputed   | 0.97                                       | 0.23 | 2.84E-22        | 0.05                                           | 5.24E-02        | Possible                       |
| rs1331309      | 135,447,871     | Imputed   | 0.96                                       | 0.27 | 2.71E-20        | 0.05                                           | 5.81E-02        | Possible                       |
| rs9376090      | 135,452,921     | Imputed   | 0.97                                       | 0.23 | 1.68E-22        | 0.04                                           | 3.15E-03        | Possible                       |
| rs7775698      | 135,460,328     | Genotyped | 0.99                                       | 0.22 | 1.36E-23        | 0.19                                           | 1.58E-01        | No                             |
| rs7776054      | 135,460,609     | Imputed   | 0.99                                       | 0.22 | 1.48E-23        | 0.25                                           | 3.76E-02        | No                             |
| rs9399137      | 135,460,711     | Genotyped | 1.00                                       | 0.22 | 7.34E-24        | 0.05                                           | 4.20E-06        | Possible                       |
| rs11321816     | 135,460,731     | Imputed   | 0.99                                       | 0.24 | 1.94E-22        | 0.03                                           | 4.66E-03        | Possible                       |
| rs56293029     | 135,460,732     | Imputed   | 0.98                                       | 0.25 | 3.43E-22        | 0.17                                           | 6.86E-01        | No                             |
| rs35786788     | 135,460,735     | Imputed   | 0.99                                       | 0.22 | 7.78E-24        | 0.03                                           | 1.78E-03        | Possible                       |
| rs9389268      | 135,461,324     | Imputed   | 0.99                                       | 0.22 | 7.61E-24        | 0.19                                           | 1.36E-01        | No                             |
| rs9376091      | 135,461,329     | Imputed   | 0.93                                       | 0.24 | 1.93E-22        | 0.21                                           | 3.80E-01        | No                             |
| rs9402685      | 135,461,381     | Imputed   | 0.99                                       | 0.22 | 7.50E-24        | 0.28                                           | 2.10E-01        | No                             |
| rs11969203     | 135,462,591     | Imputed   | 0.88                                       | 0.17 | 3.50E-20        | 0.45                                           | 7.13E-04        | No                             |
| rs11759553     | 135,463,989     | Imputed   | 0.83                                       | 0.24 | 4.21E-21        | 0.32                                           | 6.12E-04        | No                             |
| rs9373124      | 135,464,902     | Imputed   | 0.84                                       | 0.24 | 5.22E-21        | 0.44                                           | 2.43E-03        | No                             |
| rs35959442     | 135,465,872     | Imputed   | 0.83                                       | 0.24 | 5.26E-21        | 0.31                                           | 1.12E-03        | No                             |
| rs4895440      | 135,468,251     | Imputed   | 0.83                                       | 0.24 | 5.85E-21        | 0.31                                           | 4.93E-04        | No                             |
| rs4895441      | 135,468,266     | Genotyped | 0.83                                       | 0.24 | 5.94E-21        | 0.09                                           | 1.53E-05        | Possible                       |
| rs9376092      | 135,468,837     | Genotyped | 0.83                                       | 0.24 | 5.92E-21        | 0.20                                           | 1.93E-02        | No                             |
| rs9389269      | 135,468,852     | Imputed   | 0.83                                       | 0.24 | 5.92E-21        | 0.08                                           | 1.87E-07        | Possible                       |
| rs9402686      | 135,469,510     | Imputed   | 0.84                                       | 0.24 | 5.02E-21        | 0.08                                           | 1.83E-07        | Possible                       |
| rs7758845      | 135,470,230     | Imputed   | 0.83                                       | 0.24 | 5.49E-21        | 0.30                                           | 2.42E-02        | No                             |
| rs6920211      | 135,473,011     | Imputed   | 0.76                                       | 0.24 | 2.32E-21        | 0.35                                           | 3.43E-03        | No                             |
| rs11154792     | 135,473,333     | Imputed   | 0.76                                       | 0.24 | 2.64E-21        | 0.12                                           | 2.17E-08        | Possible                       |
| rs9494145      | 135,474,245     | Genotyped | 0.60                                       | 0.22 | 1.73E-18        | 0.07                                           | 4.10E-08        | Unlikely                       |
| chr6:135474996 | 135,474,996     | Imputed   | 0.48                                       | 0.32 | 1.65E-16        | 0.0                                            | ---             | No                             |
| rs9483788      | 135,477,194     | Imputed   | 0.52                                       | 0.25 | 4.59E-16        | 0.07                                           | 8.58E-08        | Unlikely                       |

## Table S3

### Illumina SNP assay for rs7775698

Illumina Infinium II Assay ID rs7775698-131\_B\_F\_1863223089 was used to genotype rs7775698, at 6: 135,460,328. The first step was hybridization of unlabeled DNA fragment to the 50-bp probe, colored in green in the following table, on the array. The second step was enzymatic single base extension with labeled nucleotide to interrogate the rs7775698 genotype.

A. For rs7775698 with the major allele **C** as found in most subjects, the probe would identify the **C** nucleotide, colored in red below.

**CTCTACTGACACAACATCAGGATTAAATTC**ACTCTGGACAGCAGATGTTA  
TAAGAACTCTACTGACACAACATCAGGATTAAATTC**ACTCTGGACAGCAGATGTTA**C**T**TATATCAAACCA

B. For rs7775698 with the minor allele **T**, without the 3-bp deletion as found in most African subjects, the probe would identify the **T** nucleotide, colored in red below.

**CTCTACTGACACAACATCAGGATTAAATTC**ACTCTGGACAGCAGATGTTA  
TAAGAACTCTACTGACACAACATCAGGATTAAATTC**ACTCTGGACAGCAGATGTTA**T**T**TATATCAAACCA

C. The nucleotide sequences with the 3-bp deletion, 6: 135,460,326 to 135,460,328 as found in the Chinese population for example, are shown below with the " - - " representing the 3-bp deletion. The 'final' sequences with the 3-bp deletion are shown below on the last line. The probe used to genotype rs7775698 would still identify a **T** nucleotide, in spite of the presence of the 3-bp deletion.

**CTCTACTGACACAACATCAGGATTAAATTC**ACTCTGGACAGCAGATGTTA  
TAAGAACTCTACTGACACAACATCAGGATTAAATTC**ACTCTGGACAGCAGATGT** - - -TATATCAAACCA  
TAAGAACTCTACTGACACAACATCAGGATTAAATTC**ACTCTGGACAGCAGATGTTA**T**T**ATCAAACCA

## Table S4

**MAF of and LD between rs7775698 and rs9399137 among Different Populations from HapMap database.**

| <b>Populations outside of Africa</b> |                                                            | <b>r<sup>2</sup> between<br/>rs7775698 and<br/>rs9399137</b> | <b>rs7775698 MAF</b> | <b>rs9399137 MAF</b> | <b>Frequency of<br/>3-bp deletion based on<br/>haplotype rs7775698(T)<br/>rs9399137(C)</b> |
|--------------------------------------|------------------------------------------------------------|--------------------------------------------------------------|----------------------|----------------------|--------------------------------------------------------------------------------------------|
| CEU                                  | Utah residents with Northern and Western European ancestry | 1.00                                                         | 0.20                 | 0.20                 | 0.20                                                                                       |
| CHB                                  | Han Chinese in Beijing, China                              | 0.88                                                         | 0.29                 | 0.27                 | 0.27                                                                                       |
| CHD                                  | Chinese in Metropolitan Denver, Colorado                   | 0.94                                                         | 0.32                 | 0.29                 | 0.29                                                                                       |
| GIH                                  | Gujarati Indians in Houston, Texas                         | 0.95                                                         | 0.13                 | 0.13                 | 0.13                                                                                       |
| JPT                                  | Japanese in Tokyo, Japan                                   | 1.00                                                         | 0.32                 | 0.32                 | 0.32                                                                                       |
| MEX                                  | Mexican ancestry in Los Angeles, California                | 0.85                                                         | 0.19                 | 0.15                 | 0.15                                                                                       |
| TSI                                  | Toscans in Italy                                           | 0.97                                                         | 0.25                 | 0.24                 | 0.24                                                                                       |
|                                      | Mean ± SD                                                  | <b>0.94 ± 0.06</b>                                           | <b>0.24 ± 0.07</b>   | <b>0.23 ± 0.07</b>   | <b>0.23 ± 0.07</b>                                                                         |

| <b>Populations of African Descent</b> |                                   | <b>r<sup>2</sup> between<br/>rs7775698 and<br/>rs9399137</b> | <b>rs7775698 MAF</b> | <b>rs9399137 MAF</b> | <b>Frequency of haplotype<br/>rs7775698(T)<br/>rs9399137(C)</b> |
|---------------------------------------|-----------------------------------|--------------------------------------------------------------|----------------------|----------------------|-----------------------------------------------------------------|
| ASW                                   | African ancestry in Southwest USA | 0.22                                                         | 0.18                 | 0.08                 | 0.08                                                            |
| LWK                                   | Luhya in Webuye, Kenya            | 0.22                                                         | 0.21                 | 0.06                 | 0.06                                                            |
| MKK                                   | Maasai in Kinyawa, Kenya          | 0.16                                                         | 0.25                 | 0.05                 | 0.05                                                            |
| YRI                                   | Yoruba in Ibadan, Nigeria         | 0.14                                                         | 0.23                 | 0.04                 | 0.04                                                            |
|                                       | Mean ± SD of LWK, MKK, YRI        | <b>0.17 ± 0.04</b>                                           | <b>0.22 ± 0.02</b>   | <b>0.05 ± 0.01</b>   | <b>0.05 ± 0.01</b>                                              |

**Table S5****Transcription factor binding sites near candidate functional variants.**

| <b>SNP and Deletion</b> | <b>Chr. 6 Position</b>    | <b>Nearby Putative Transcription Factor Binding Sites (Score &gt; 10)</b> | <b>GATA motif</b> |
|-------------------------|---------------------------|---------------------------------------------------------------------------|-------------------|
| rs9399136               | 135,444,032               | ---                                                                       | ---               |
| rs1331309               | 135,447,871               | HMG-1Y; SQUA                                                              | ---               |
| rs9376090               | 135,452,921               | ---                                                                       | GATA              |
| 3-bp deletion           | 135,460,326 – 135,460,328 | TAL1/SCL; E47; RUNX1/AML1                                                 | GATA              |
| rs9399137               | 135,460,711               | TAL1/SCL; E47                                                             | ---               |
| rs11321816              | 135,460,731               | ---                                                                       | GATA              |
| rs35786788              | 135,460,735               | ---                                                                       | GATA              |
| rs4895441               | 135,468,266               | ---                                                                       | ---               |
| rs9389269               | 135,468,852               | ---                                                                       | ---               |
| rs9402686               | 135,469,510               | RORalpha-1; Broad complex 1                                               | ---               |
| rs11154792              | 135,473,333               | ---                                                                       | GATA              |

**Figure S1A**

Linkage disequilibrium plot for the HMIP region on chromosome 6q23.

**Figure S1B**

Linkage disequilibrium plot for the *BCL11A* region on chromosome 2p16.

**Figure S2**

Phylogenetic alignment of sequences in region surrounding the TAC 3-bp deletion, showing conservation among many vertebrates, as displayed by the 44-Species Conservation Track from UCSC Genome Browser. The region is flanked by 2 highly conserved sequences with log odds conserved element scores of 64 and 84.

**Figure S3**

Chromatin immunoprecipitation (ChIP) assay.

- A** Nucleotide sequences encompassing the 3-bp deletion polymorphism showing the PCR primers used in the ChIP assay.
- B** Real-time PCR standard curve. IgG, control using IgG for immunoprecipitation.
- C** Relative real-time PCR signal intensities of the ChIP assay, showing significant binding of TAL1, E47, GATA2, RUNX1 to the immediate vicinity of the 3 bp deletion polymorphism. H3, positive control using antibody against histone H3, and RT-PCR using exon 3 primer set.

Figure S1A

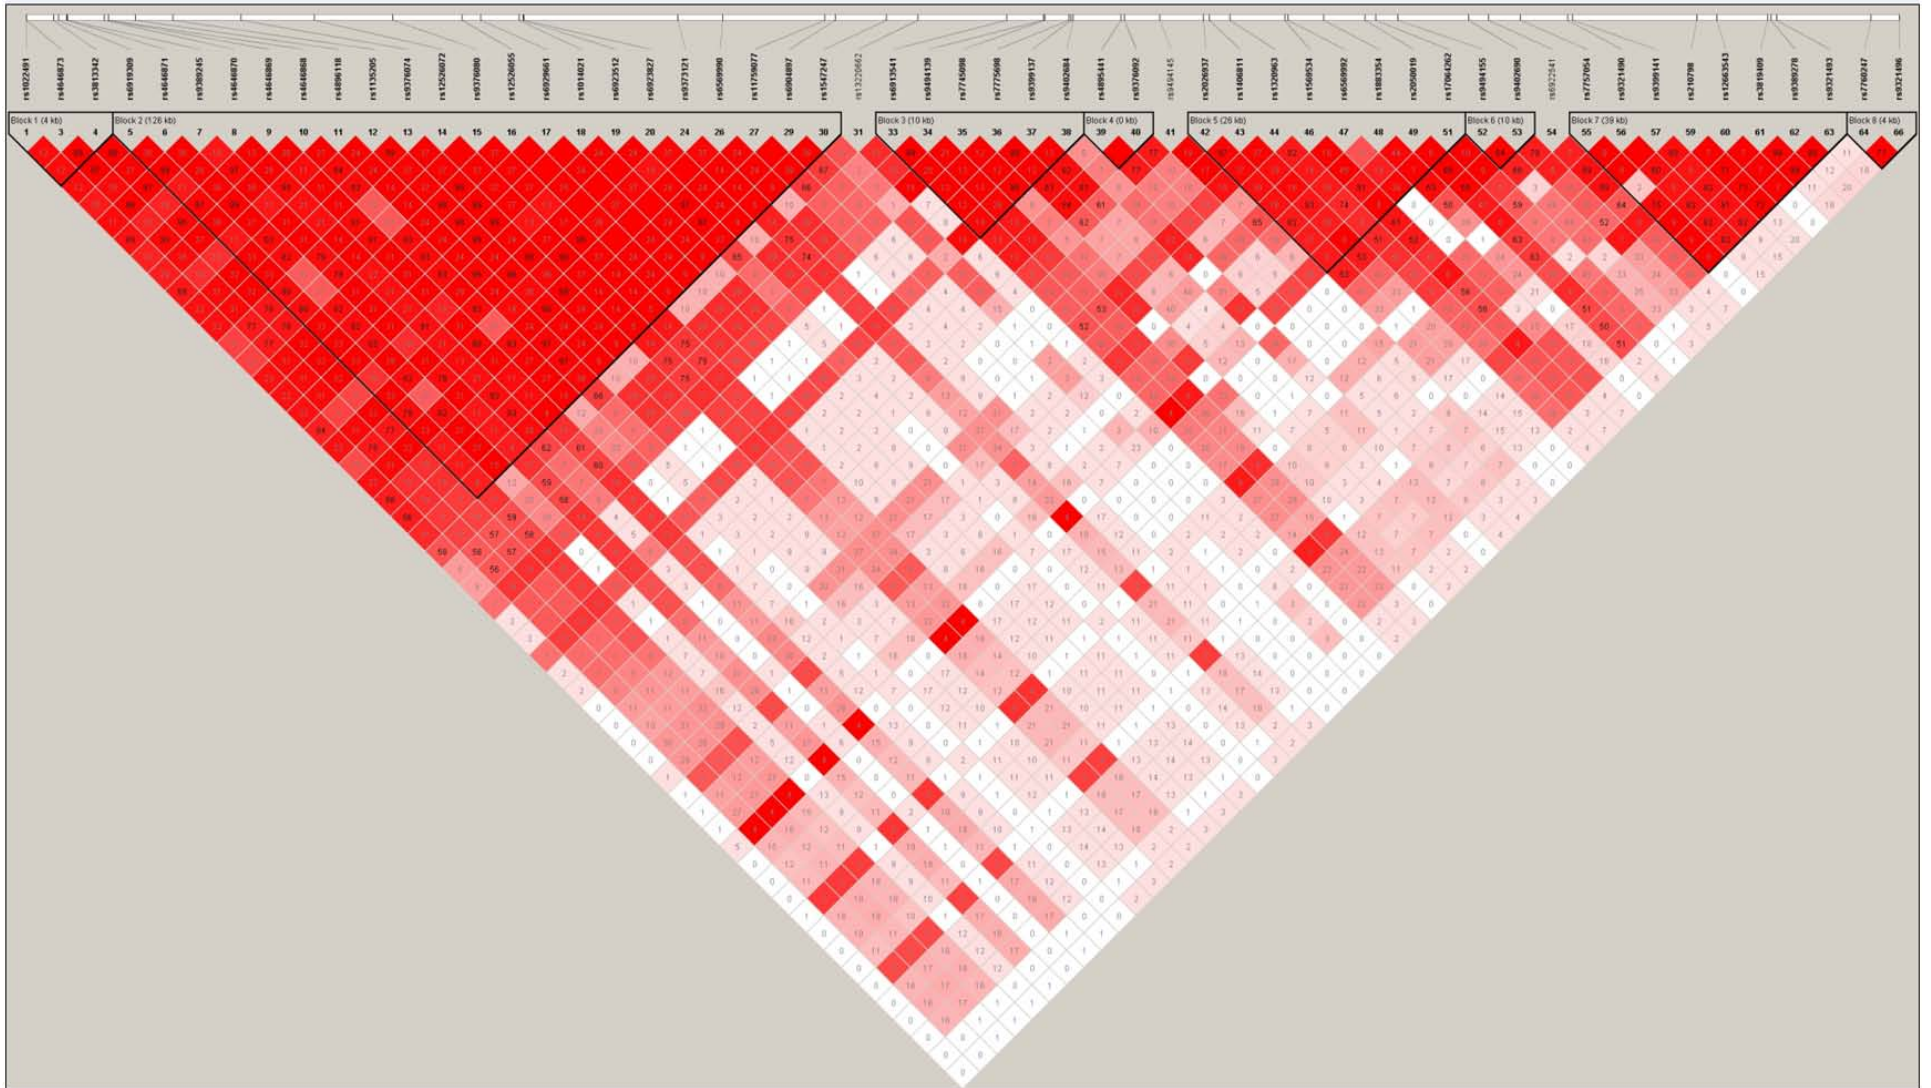





Figure S2

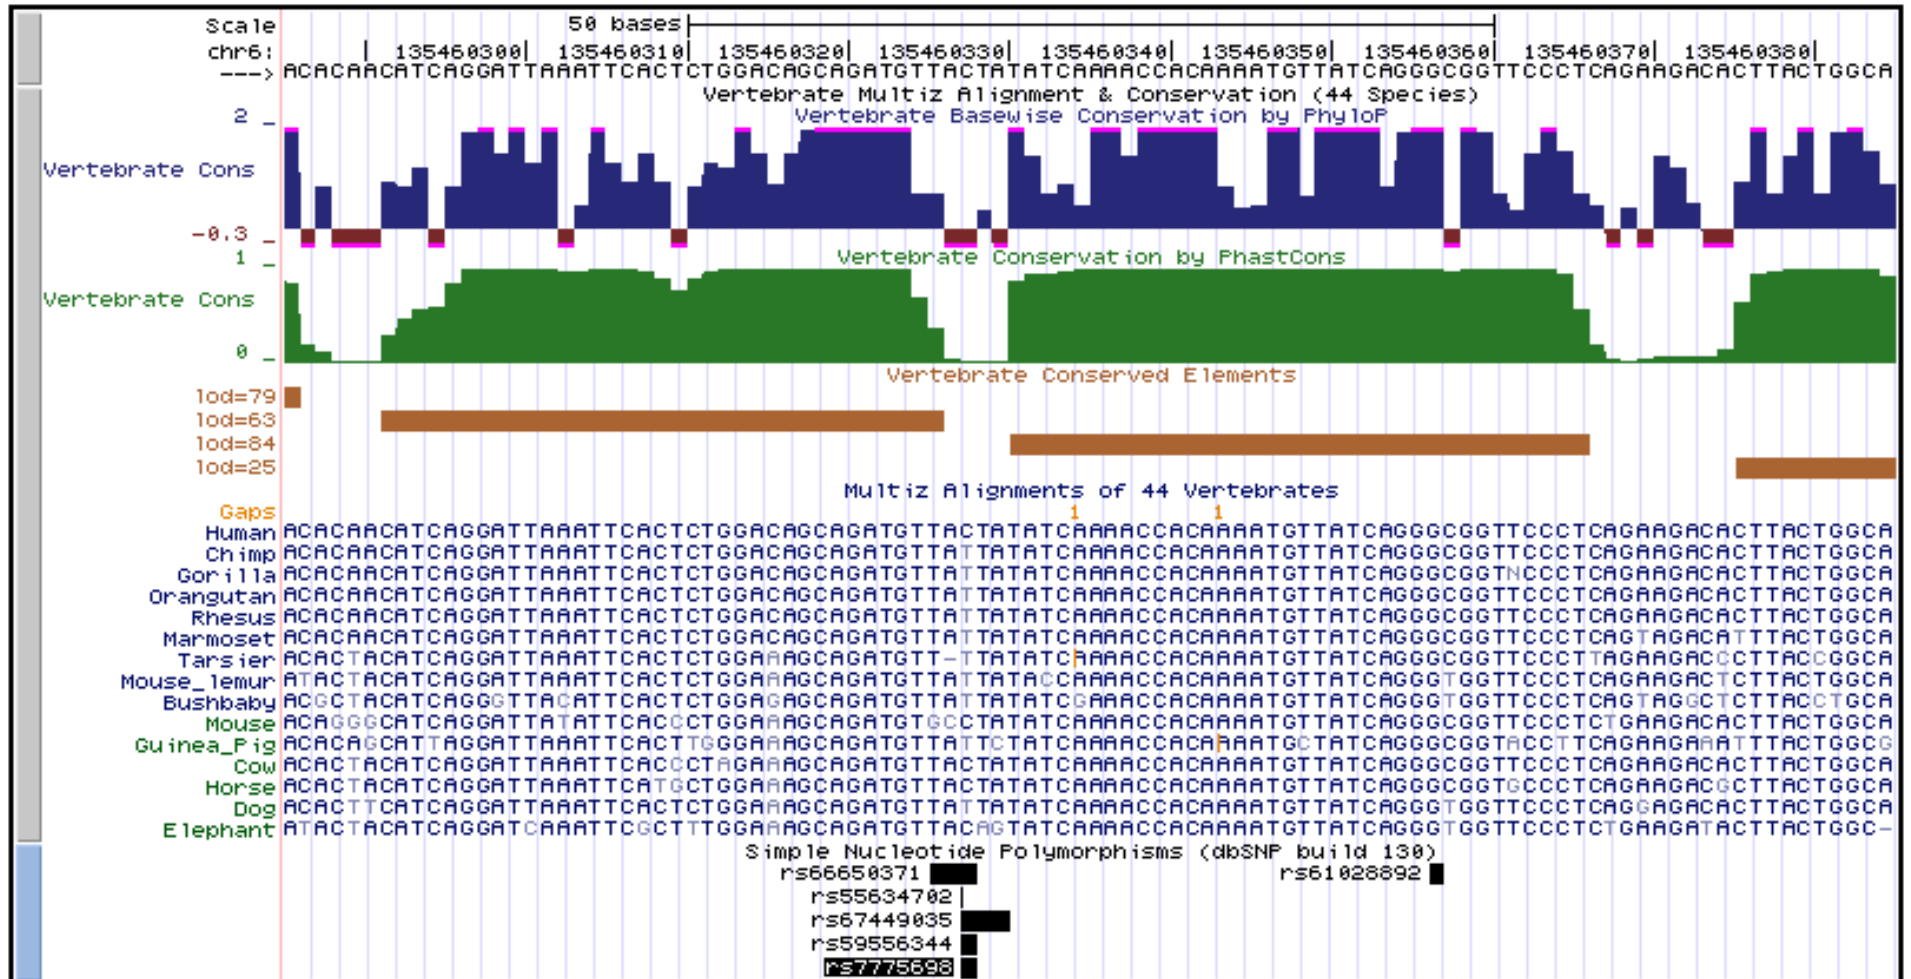

**Figure S3**

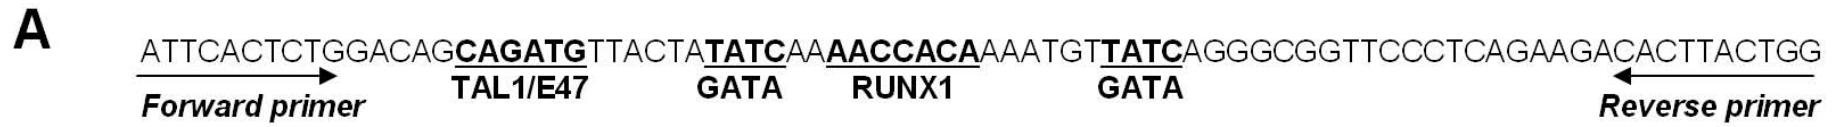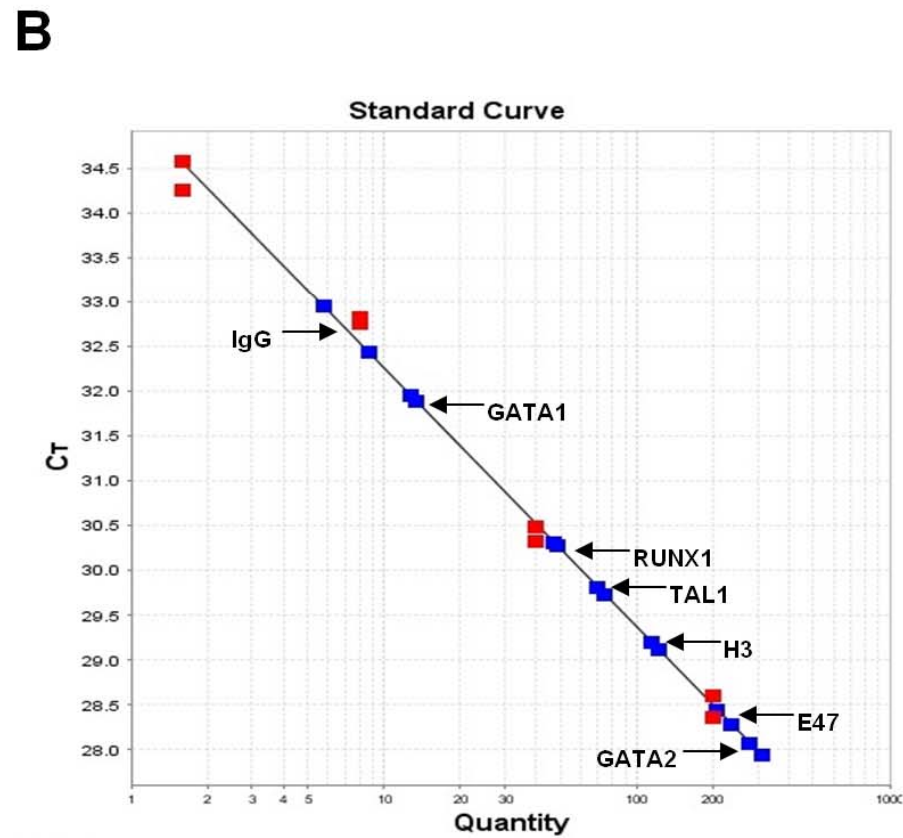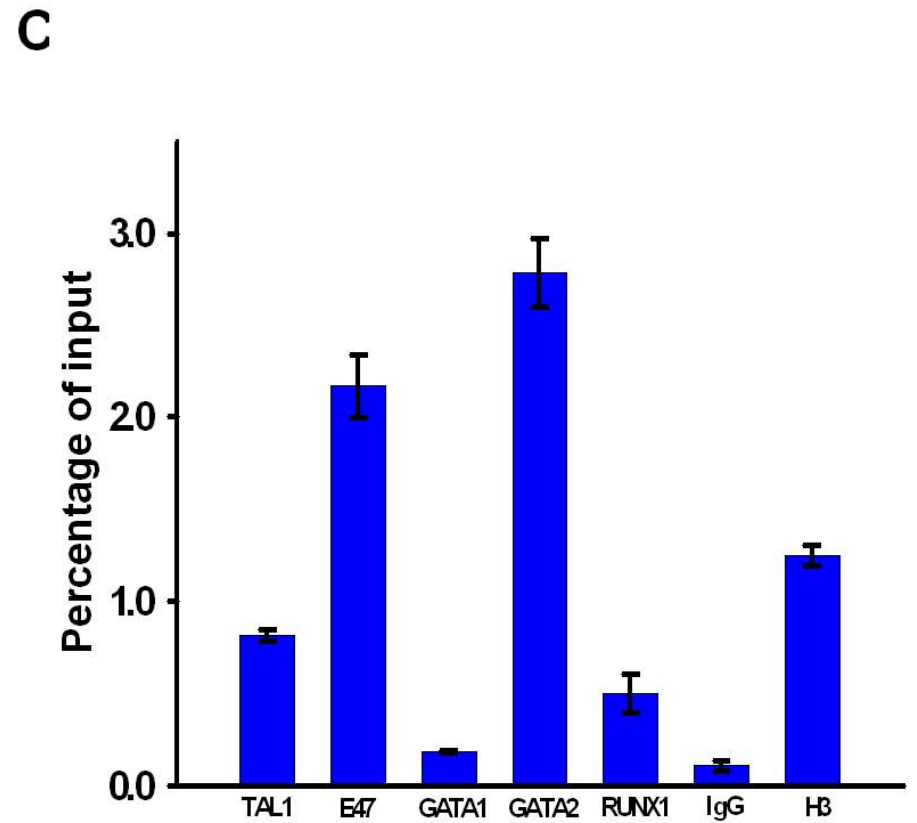

Supplement: supp_blood-2010-11-317081_Document1.pdf [file supp_blood-2010-11-317081_Document1.pdf]
